# Supplementary material
Source: PubMed Central journal article supplement (PMC7358119)

Supplementary Figure 1

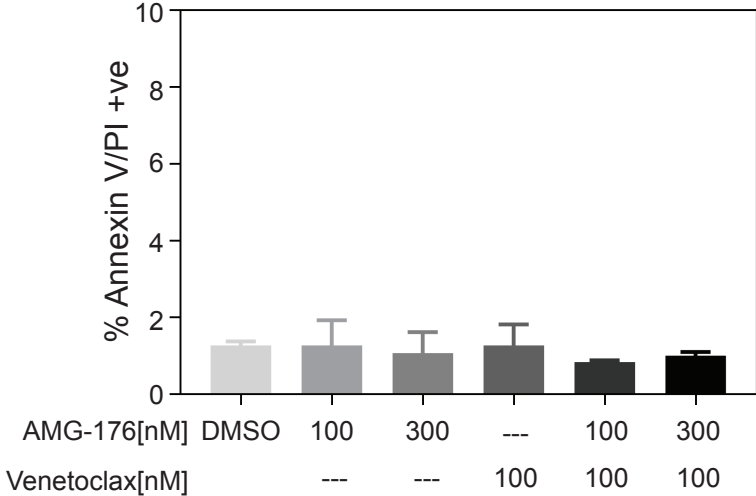

### Supplementary Figure 2

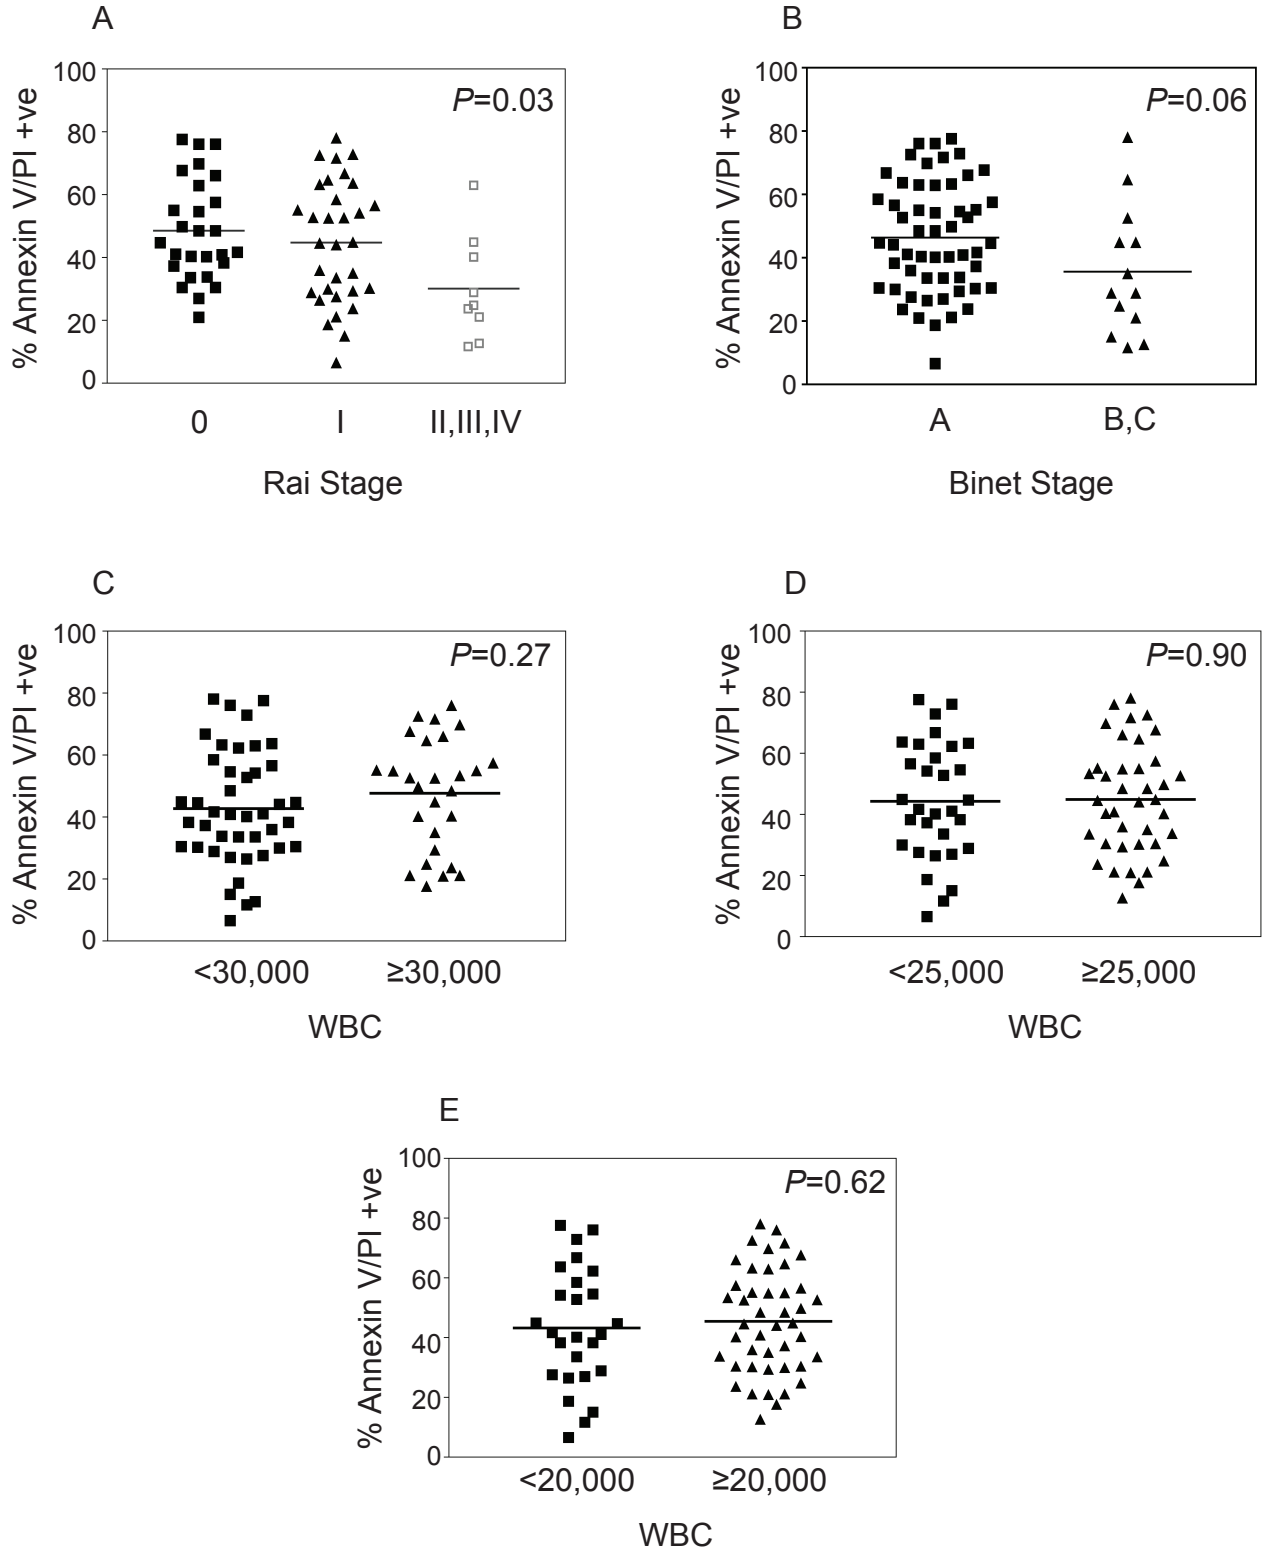

### Supplementary Figure 3

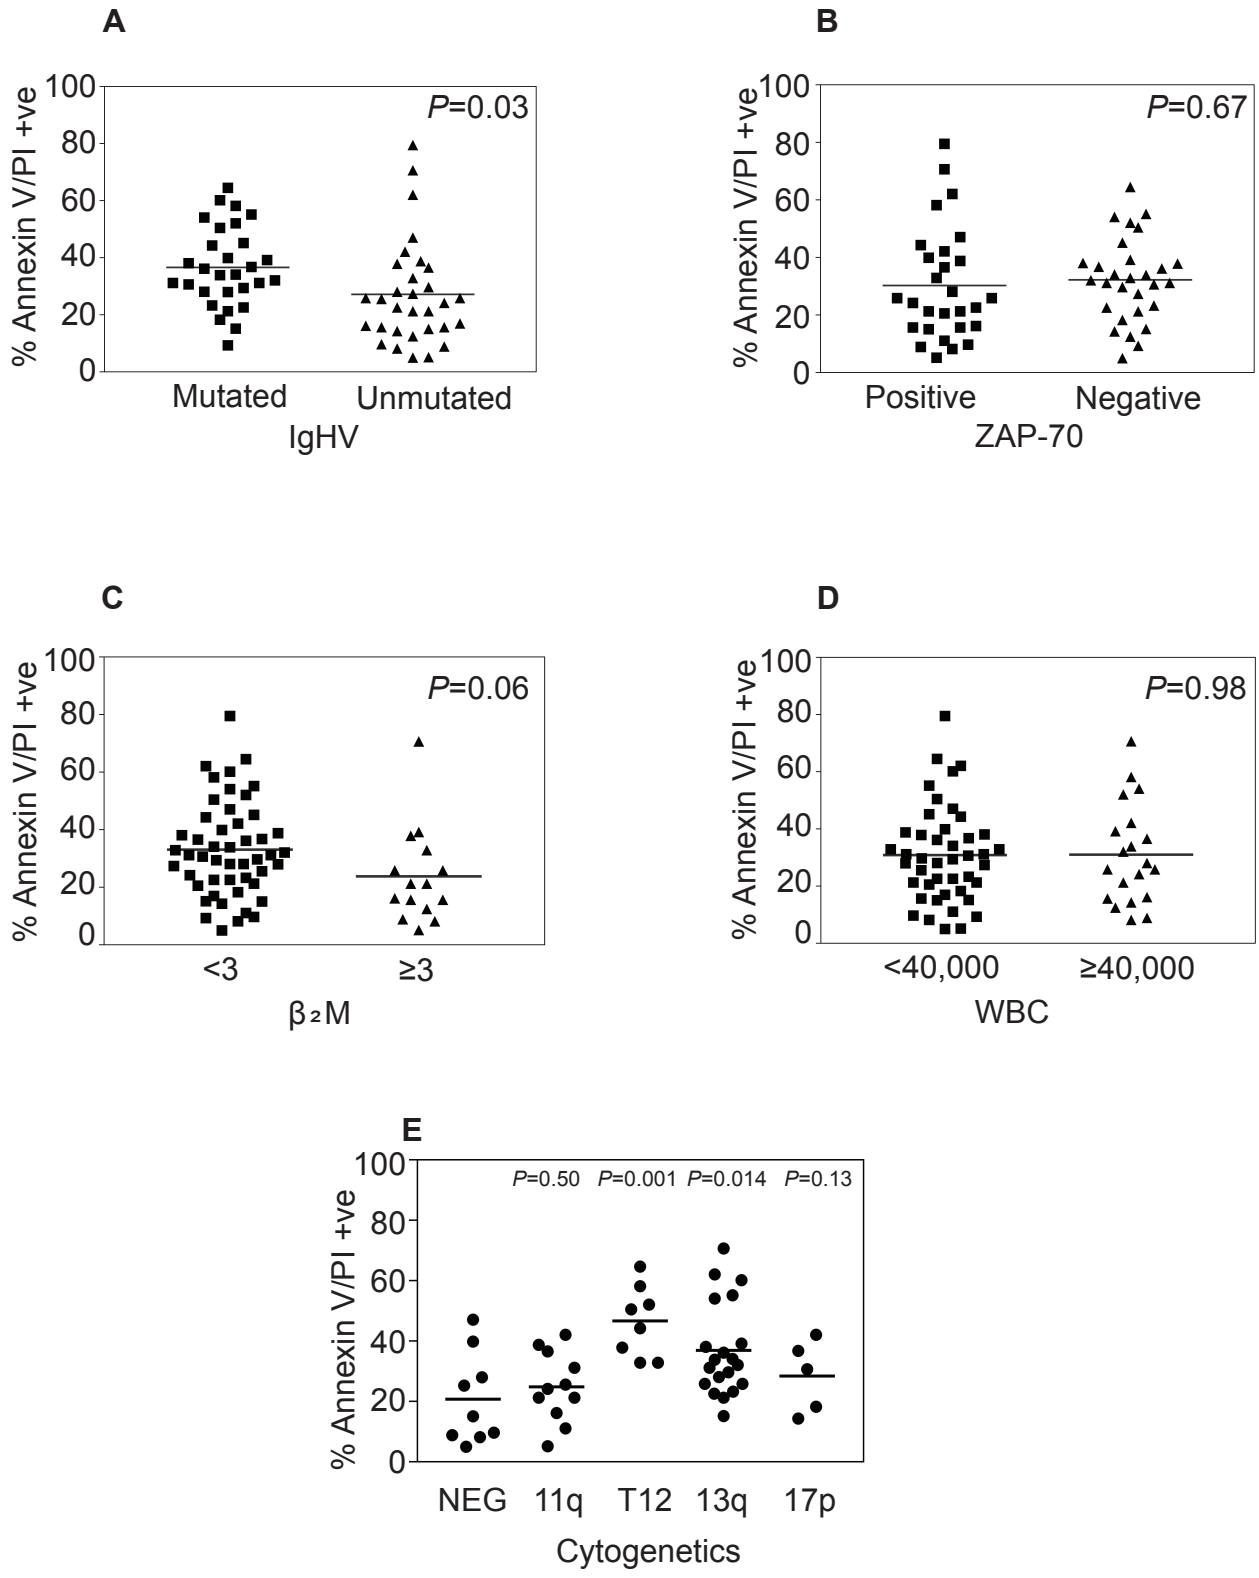

Supplementary Figure 4

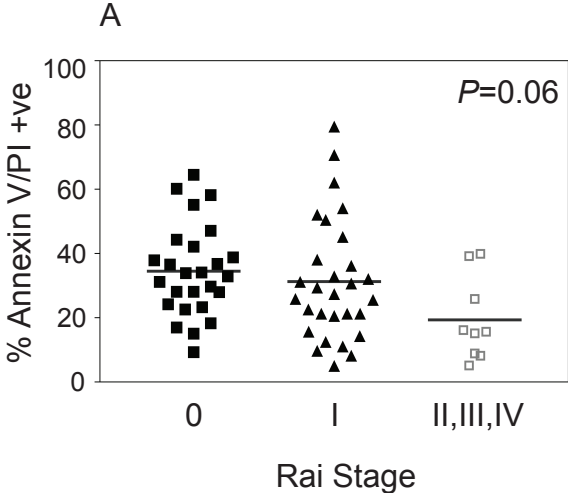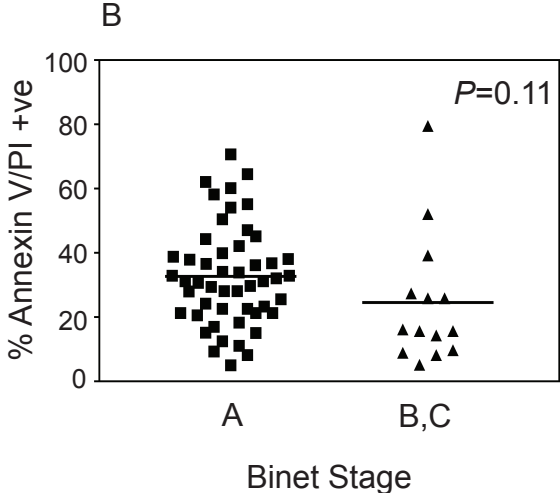

Supplementary Figure 5

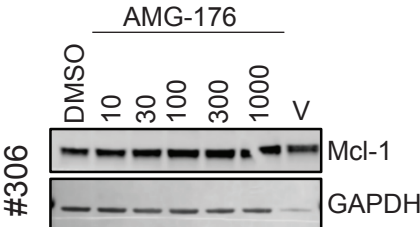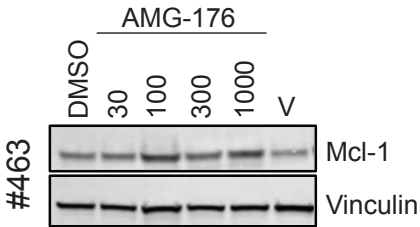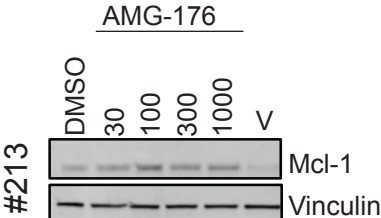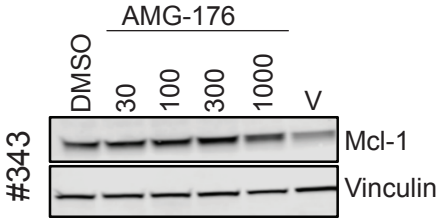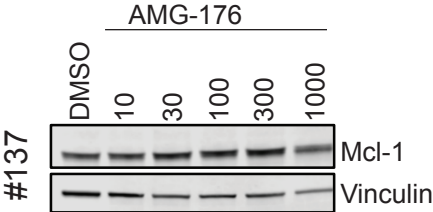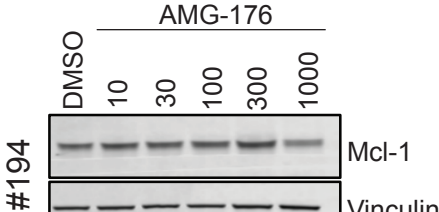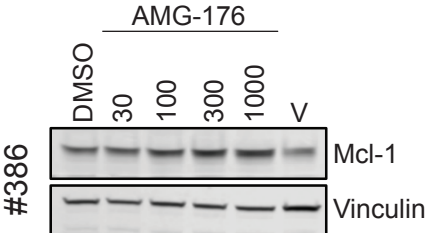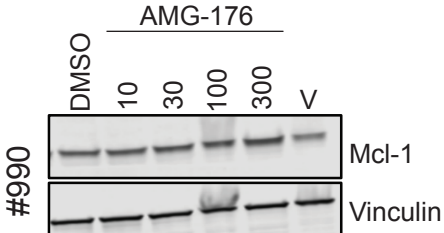

## Supplementary Figure 6

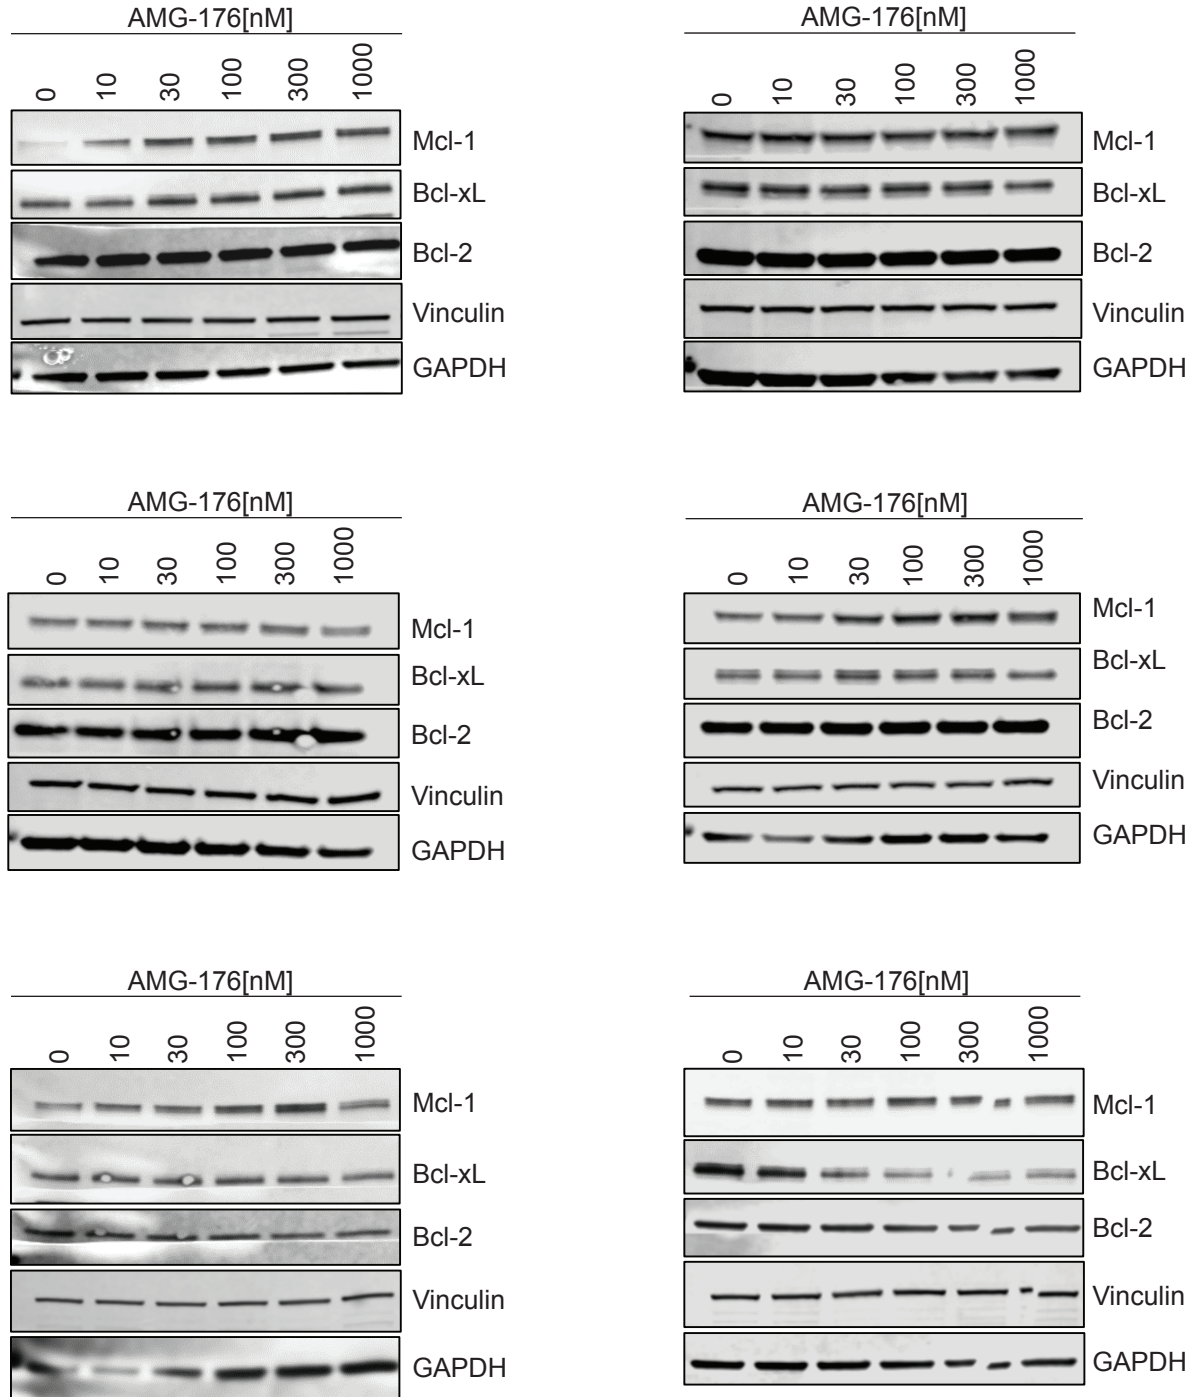

## Supplementary Figure 7

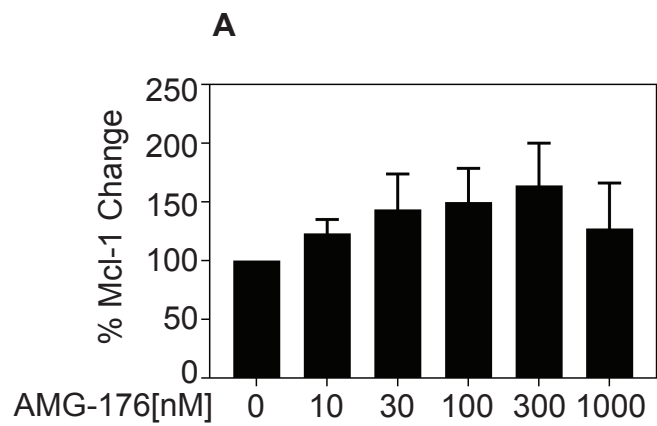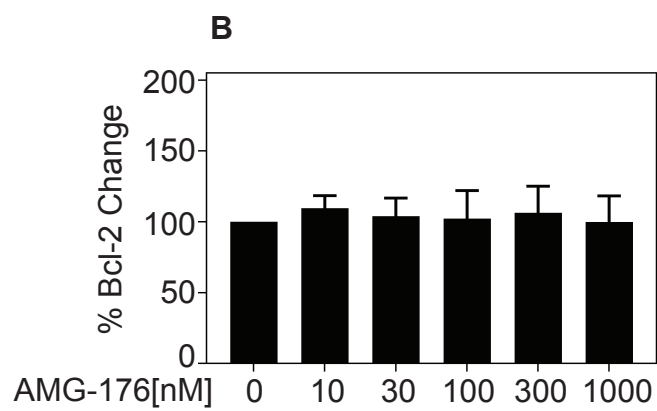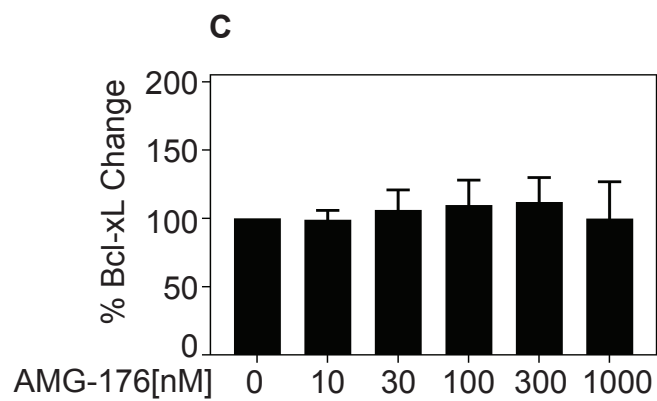

**Supplementary Figure 8**

**A**

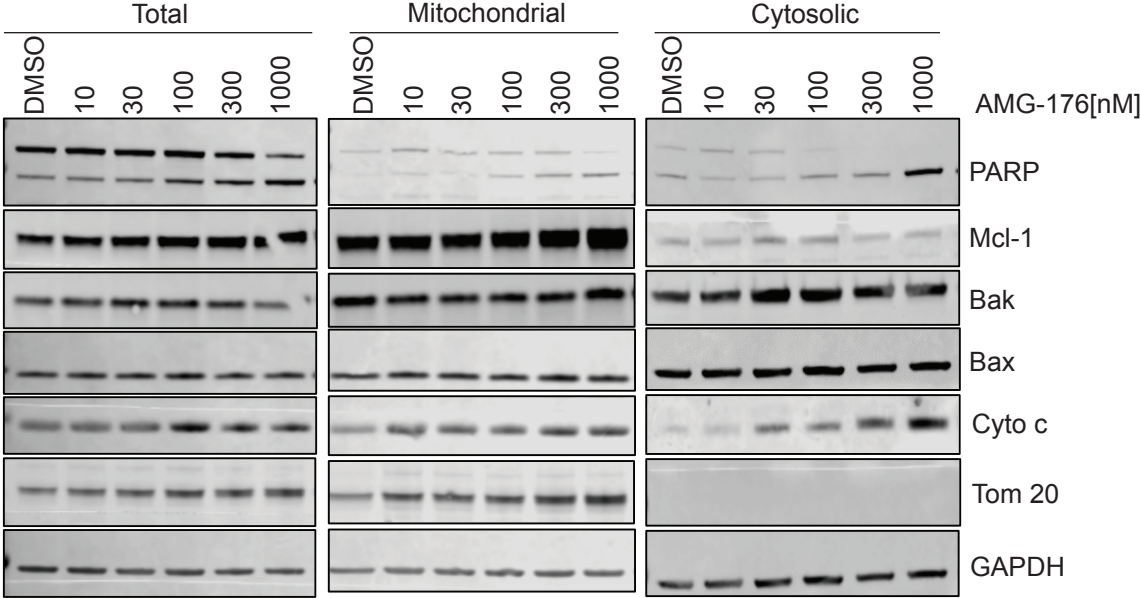

**B**

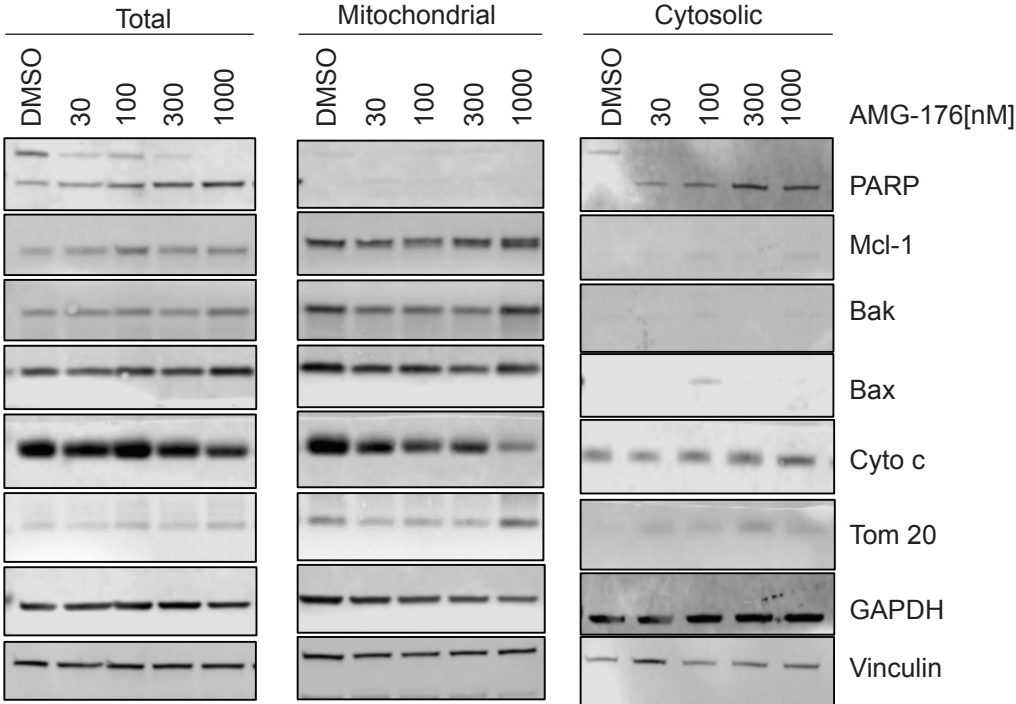



Supplementary Figure 9

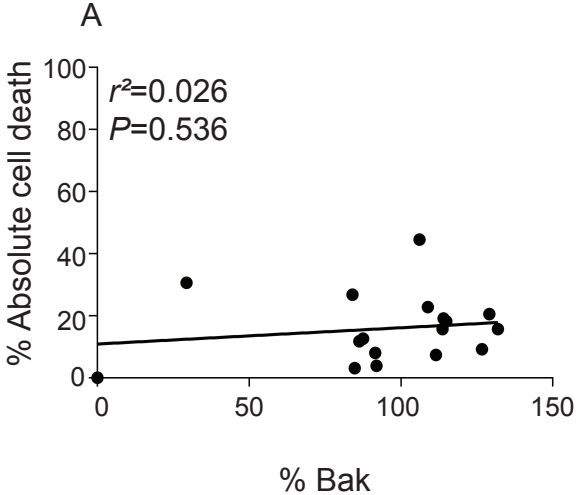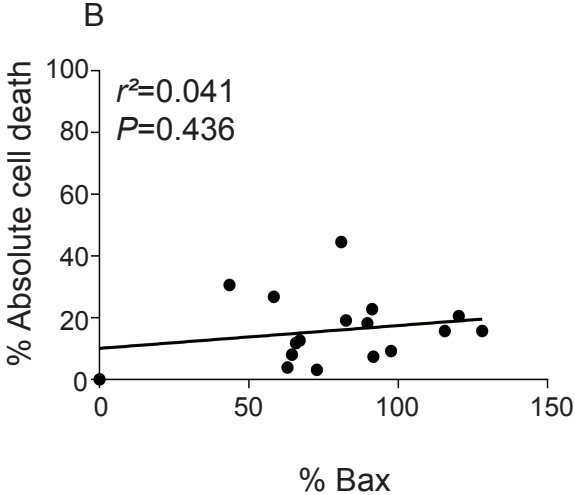

Supplement: NIHMS1550096-supplement-2.pdf [file NIHMS1550096-supplement-2.pdf]
