# Supplementary material
Source: PubMed Central journal article supplement (PMC7358119)
Supplement: NIHMS1550096-supplement-3.pdf [file NIHMS1550096-supplement-3.pdf]

Supplementary Table 1. Characteristics of patients from whom samples were used for this project

| #    | Sex | Prior Rx# | 100 nM AMG | 300 nM AMG | Binet | Rai | PB_W BC | PB_HGB | PB_PLT | PB_Neut | PB_Lymph | PB_IgG | PB_IgA | PB_IgM | PB_LDH | PB_B2M | IGHV | Zap-70 | FISH | Karyotype                                                      |
|------|-----|-----------|------------|------------|-------|-----|---------|--------|--------|---------|----------|--------|--------|--------|--------|--------|------|--------|------|----------------------------------------------------------------|
| 455  | M   | 0         | 5.2        | 12.7       | C     | IV  | 22.4    | 11.9   | 53     | 5       | 94       | 518    | 44     | 44     | 167    | 4.6    | UM   | POS    | 11Q  | 46,XY,del(6)(q13q23)[7]/46,XY[13]                              |
| 7043 | M   | 0         | 21.3       | 26.5       | A     | I   | 14.2    | 14.4   | 213    | 55      | 44       | 833    | 108    | 50     | 196    | 2.7    | UM   | POS    | 11Q  | 46,XY,del(11)(q13q23)[4]/46,XY[16]                             |
| 749  | M   | 0         | 16.17      | 24.8       | C     | III | 102     | 9.3    | 119    | 5       | 90       | 979    | 269    | 22     | 216    | 3.7    | UM   | POS    | 11Q  | ND                                                             |
| 356  | M   | 0         | 19.2       | 17.7       | A     | I   | 159     | 11.7   | 212    | 7       | 93       | 801    | 67     | 17     | 222    | 3.6    | UM   | POS    | 11Q  | ND                                                             |
| 213  | M   | 0         | 70.7       | 72.6       | A     | I   | 221     | 14.2   | 142    | 5       | 94       | 1070   | 36     | 354    | 337    | 4      | UM   | POS    | 13Q  | 46,XY,del(6)(p21.3p23),ins(13;?)(q14;?)[4]/46,XY[16]           |
| 595  | M   | 0         | 36.6       | 48.5       | A     | 0   | 95.6    | 13.2   | 114    | 4       | 95       | 751    | 308    | 46     | 347    | 2.5    | UM   | POS    | 11Q  | ND                                                             |
| 652  | M   | 0         | 25.6       | 44.1       | A     | I   | 22      | 14.9   | 272    | 35      | 62       | 1360   | 221    | 67     | 347    | 2      | UM   | ND     | 11Q  | ND                                                             |
| 221  | F   | 0         | 62.1       | 72.9       | A     | I   | 14.4    | 13.3   | 340    | 37      | 60       | 970    | 270    | 52     | 360    | 1.4    | UM   | POS    | 13Q  | 46,XX[20]                                                      |
| 3056 | M   | 2         | 29.4       | 52.8       | A     | I   | 5.7     | 12.9   | 131    | 70      | 23       | 717    | 77     | 34     | 371    | 1.8    | MU   | ND     | ND   | 46,XY{20}                                                      |
| 659  | F   | 0         | 20.6       | 18.7       | A     | I   | 10.8    | 13.5   | 249    | 22      | 68       | 982    | 99     | 46     | 376    | 1.5    | ND   | POS    | ND   | ND                                                             |
| 3552 | M   | 0         | ND         | 30.5       | A     | 0   | 21.5    | 15.6   | 177    | 13      | 83       | 1030   | 198    | 156    | 382    | 1.5    | MU   | ND     | ND   | 46XY[18]                                                       |
| 839  | F   | 0         | 45.2       | 55.2       | A     | I   | 30.5    | 14.3   | 188    | 16      | 77       | 826    | 208    | 88     | 386    | 2      | MU   | NEG    | ND   | 46,XX{17}                                                      |
| 720  | F   | 0         | 29.4       | 44.9       | B     | I   | 18.7    | 12.2   | 204    | 11      | 87       | 1268   | 143    | 241    | 387    | 2.2    | UM   | NEG    | ND   | ND                                                             |
| 291  | F   | 0         | 34.1       | 54.6       | A     | 0   | 18.5    | 12.5   | 232    | 31      | 66       | 1081   | 228    | 46     | 387    | 1.6    | M    | NEG    | 13Q  | 43,X,-X,t(8;11)(q22;p15),-10,-15[1]/46,XX[19]                  |
| 575  | F   | 0         | 12.5       | 21.2       | A     | I   | 49.9    | 15.2   | 263    | 14      | 81       | 1260   |        | 64     | 387    | 3.3    | UM   | NEG    | ND   | 46,XX[19]                                                      |
| 289  | M   | 0         | 60.2       | 66.1       | A     | 0   | 36.7    | 13.5   | 205    | 13      | 86       | 1059   | 72     | 68     | 390    | 1.8    | M    | ND     | 13Q  | ND                                                             |
| 732  | M   | 0         | 31.2       | 36         | A     | I   | 20.9    | 15.1   | 232    | 54      | 37       | 700    | 113    | 47     | 391    | 1.2    | M    | NEG    | 13Q  | 46,XY[20]                                                      |
| 306  | M   | 0         | 22.6       | 33.6       | A     | I   | 22      | 15.7   | 237    | 17      | 80       | 854    | 163    | 41     | 406    | 2      | MU   | NEG    | NEG  | 46,XY,del(1)(p13)[1],46,XY[19]                                 |
| 244  | M   | 0         | 24.2       | 49.8       | A     | 0   | 69.7    | 14.9   | 199    | 11      | 89       | 660    | 74     | 31     | 407    | 2.2    | UM   | POS    | 11Q  | ND                                                             |
| 907  | M   | 0         | 38.8       | 76.1       | A     | 0   | 12.7    | 15.3   | 306    | 22      | 68       | 523    | 113    | 17     | 412    | 1.6    | UM   | POS    | 11Q  | 46,XY[20]                                                      |
| 518  | M   | 2         | 22.6       | 44.7       | A     | 0   | 7.1     | 14.3   | 265    | 53      | 26       | 777    | 216    | 46     | 414    | 1.9    | UM   | POS    | 13Q  | 46,XY{20}                                                      |
| 742  | F   | 1         | ND         | 27         | A     | 0   | 1.9     | 13     | 159    | 59      | 31       | 807    | 119    | 51     | 425    | 1.4    | UM   | POS    | ND   | 46,XX,t(1;7)(p36.1;q11.2)?c[20]                                |
| 660  | M   | 0         | 36.2       | 66.8       | A     | I   | 17.1    | 15.3   | 173    | 11      | 85       | 871    | 201    | 27     | 426    | 1.8    | MU   | NEG    | 13Q  | 46,XY,del(3)(q21),del(5)(q13q35)[1]/46,XY[19]                  |
| 112  | M   | 0         | 47.1       | 67.7       | A     | 0   | 38.3    | 15.5   | 226    | 10      | 85       | 653    | 142    | 43     | 432    | 2.1    | UM   | POS    | NEG  | ND                                                             |
| 267  | M   | 0         | 15.1       | 38.3       | A     | 0   | 17.8    | 14     | 266    | 34      | 61       | 439    | 63     | 14     | 444    | 2.4    | UM   | POS    | NEG  | ND                                                             |
| 493  | M   | 0         | 32.1       | 52.7       | A     | I   | 40.7    | 15.7   | 211    | 17      | 79       | 972    | 58     | 55     | 447    | 2.3    | MU   | NEG    | 13Q  | 46,XY{20}                                                      |
| 9005 | M   | 0         | 39.9       | 63         | A     | II  | 29.3    | 16     | 147    | 15      | 84       | 978    | 212    | 30     | 448    | 1.1    | MU   | POS    | NEG  | 46,XY[20]                                                      |
| 8552 | M   | 0         | ND         | 30         | A     | I   | 25.1    | 15.5   | 137    | 15      | 84       | 1112   | 200    | 63     | 452    | 1.9    | UM   | POS    | NEG  | ND                                                             |
| 659  | F   | 0         | ND         | 77.6       | A     | 0   | 16.6    | 13.2   | 219    | 30      | 64       | 656    | 95     | 33     | 453    | 2.8    | MU   | NEG    | 13Q  | 47,XX,+21[1]/46,XX[19]                                         |
| 429  | M   | 0         | 23.3       | 33.6       | A     | 0   | 13      | 15     | 220    | 15      | 74       | 801    | 121    | 66     | 460    | 2      | MU   | NEG    | 13Q  | 46,XY{20}                                                      |
| 408  | M   | 0         | 58.2       | 76.1       | A     | 0   | 42.3    | 12.9   | 148    | 13      | 85       | 240    | 20     | <11    | 466    | 2.9    | MU   | POS    | T12  | ND                                                             |
| 963  | F   | 0         | 11.1       | 27.6       | A     | I   | 19.1    | 14.2   | 259    | 18      | 79       | 1169   | 264    | 84     | 466    | 2.6    | NR   | POS    | 11Q  | 45,X,-X[5]/47,XX,+X[1]/46,XX,t(2;12)(p11.2;q24.3)[1]/46,XX[13] |
| 814  | F   | 0         | 21.3       | 56.6       | A     | I   | 27.3    | 12.7   | 262    | 9       | 88       | 921    | 176    | 42     | 468    | 3.8    | MU   | NEG    | 13Q  | 46,XX[20]                                                      |
| 2990 | M   | 0         | 9.3        | 21         | A     | 0   | 39.2    | 15.2   | 129    | 7       | 93       |        |        |        | 469    | 2.5    | MU   | NEG    | 12Q  | ND                                                             |
| 328  | M   | 0         | 32.9       | 54.2       | A     | I   | 11.1    | 13.6   | 128    | 35      | 63       | 677    | 154    | 67     | 471    | 4      | UM   | POS    | T12  | 46,XY[20]                                                      |
| 327  | M   | 0         | 37.9       | 33.8       | A     | 0   | 21.6    | 14.2   | 222    | 37      | 60       | 616    | 74     | 37     | 473    |        | UM   | NEG    | T12  | 46,XY[11]                                                      |

|      |   |   |      |      |   |     |      |      |     |      |      |      |     |     |      |     |    |     |     |                                                               |
|------|---|---|------|------|---|-----|------|------|-----|------|------|------|-----|-----|------|-----|----|-----|-----|---------------------------------------------------------------|
| 694  | M | 0 | 25.3 | 53.4 | C | III | 379  | 8.7  | 140 | 3    | 97   | 667  | 37  | <11 | 474  | 5.2 | UM | POS | NEG | 46,XY[6]                                                      |
| 343  | M | 0 | 79.5 | 78.1 | B | I   | 21.3 | 14.2 | 157 | 16   | 82   | 809  | 173 | 69  | 478  | 2   | UM | POS | ND  | ND                                                            |
| 915  | M | 0 | ND   | 63.3 | A | I   | 25.5 | 15.3 | 274 | 22   | 71   | 947  | 236 | 33  | 479  | 2   | MU | NEG | T12 | 46,XY[20]                                                     |
| 559  | F | 0 | ND   | 40.2 | A | II  | 11.9 | 13.2 | 175 | 50   | 45   | 584  | 65  | 88  | 484  | 2.3 | MU | NEG | NEG | ND                                                            |
| 589  | M | 0 | 5    | 6.6  | A | I   | 19   | 14.7 | 311 | 31   | 59   | 1304 | 93  | 32  | 485  | 2.4 | UM | NEG | NEG | 46,XY[20]                                                     |
| 038  | M | 0 | 28.1 | 40.9 | A | 0   | 21.3 | 15.8 | 238 | 15   | 80   | 1060 | 229 | 42  | 487  | 1.7 | M  | ND  | 13Q | 45,X,-Y[14]/46,XY[3]                                          |
| 078  | M | 0 | 17   | 48.5 | A | 0   | 24.1 | 15   | 189 | 16   | 83   | 1064 | 187 | 61  | 492  | 1.9 | UM | ND  | ND  | ND                                                            |
| 786  | M | 0 | 25.9 | 44.9 | B | II  | 79.7 | 12.5 | 126 | 3    | 92   | 582  | 20  | 17  | 512  | 5.7 | UM | POS | 13Q | 46,XY[20]                                                     |
| 110  | M | 0 | 15.2 | 23.7 | A | III | 32.5 | 10.6 | 199 | 11   | 85   | 819  | 200 | 40  | 515  | 2.4 | M  | NEG | 13Q | ND                                                            |
| 3098 | M | 0 | 44.3 | 41.1 | A | 0   | 13.9 | 16.7 | 180 | 57   | 36   | 1347 | 9   | 39  | 538  | 1.9 | MU | POS | T12 | 46,XY[20]                                                     |
| 463  | F | 0 | 8.2  | 11.7 | C | III | 6.8  | 9.2  | 303 | 29   | 59   | 326  | 98  | 39  | 538  | 4.8 | NR | ND  | NEG | ND                                                            |
| 0233 | F | 5 | 39.2 | ND   | B | III | 200  | 10.7 | 101 |      | 93   | 1540 | 15  | 12  | 541  | 5.3 | MU | NEG | ND  | 46,XX,del(13)(q12q14)[5]/46,XX[12]                            |
| 123  | M | 0 | 55.2 | ND   | A | 0   | 11.3 | 15.9 | 336 | 18   | 82   | 1100 | 274 | 62  | 545  | 1.9 | MU | NEG | 13Q | 46,XY[20]                                                     |
| 382  | M | 0 | 9.7  | 15.1 | B | I   | 17.8 | 15.5 | 263 | 30   | 66   |      |     |     | 547  | 2.2 | UM | POS | NEG | ND                                                            |
| 251  | M | 0 | 33.9 | 69.8 | A | 0   | 86.6 | 14.3 | 180 | 3    | 93   | 870  | 115 | 70  | 550  | 1.9 | MU | NEG | 13Q | 46,XY[20]                                                     |
| 642  | M | 0 | 50.5 | 63.7 | A | I   | 16.9 | 13   | 166 | 39   | 48   | 1337 | 44  | 39  | 553  | 1.6 | MU | NEG | T12 | 47,XY,+12[1]/46,XY[19]                                        |
| 468  | F | 0 | 29.7 | ND   | A | 0   | 17.8 | 12.9 | 254 | 38   | 59   | 805  | 131 | 164 | 557  | 1.6 | UM | NEG | 13Q | ND                                                            |
| 192  | M | 0 | ND   | 30.3 | A | I   | 21.7 | 14.1 | 149 | 12   | 87   | 654  | 92  | 86  | 558  | 2.2 | UM | NEG | 11Q | ND                                                            |
| 216  | M | 0 | 28.1 | 55   | A | 0   | 65.7 | 14.3 | 206 | 8    | 89   | 821  | 58  | 21  | 559  | 2   | UM | POS | NEG | 47,XY,+6[1]/46,XY[19]                                         |
| 897  | F | 0 | 36.8 | 41.7 | A | 0   | 12.6 | 14.7 | 253 | 33   | 62   | 1120 | 156 | 118 | 563  | 2   | M  | NEG | 17P | 46,XX[20]                                                     |
| 386  | F | 0 | 28   | 40.3 | A | 0   | 31.6 | 12.8 | 332 | 12   | 84   | 900  | 147 | 71  | 565  | 2.2 | M  | ND  | NEG | 46,XX[1]                                                      |
| 888  | F | 2 | 15.7 | 28.9 | B | I   | 12.4 | 11.4 | 137 | 9    | 85   |      |     |     | 566  | 3.5 | UM | POS | ND  | ND                                                            |
| 656  | M | 0 | 25.9 | 52.6 | B | I   | 41.5 | 15.3 | 234 | 7    | 90   | 1400 | 98  | 72  | 566  | 3.3 | UM | POS | 13Q | 46,XY[20]                                                     |
| 801  | M | 0 | 64.7 | 62.3 | A | 0   | 20.3 | 14.3 | 113 | 13   | 84   | 687  | 115 | 34  | 569  | 1.4 | MU | NEG | T12 | 47,XY,+12[1],46,XY[19]                                        |
| 611  | F | 0 | 8.9  | 21.1 | B | II  | 96.1 | 12.8 | 204 | 4    | 90   | 847  | 100 | 29  | 579  | 3.3 | UM | POS | NEG | 46,XX[20]                                                     |
| 878  | F | 0 | ND   | 37.3 | A | 0   | 25.9 | 13.6 | 246 | 30   | 65   | 874  | 160 | 284 | 579  | 2.5 | UM | NEG | NEG | ND                                                            |
| 689  | M | 0 | 38.1 | 44.6 | A | I   | 22   | 15.6 | 224 | 16   | 77   | 1022 | 174 | 56  | 580  | 1.3 | M  | NEG | 13Q | 46,XY[20]                                                     |
| 137  | M | 0 | 8.2  | 29.4 | A | I   | 46.9 | 14.1 | 145 | 4    | 93   | 511  | 33  | <11 | 652  | 2   | UM | POS | ND  | ND                                                            |
| 354  | M | 0 | 52.1 | 64.7 | B | I   | 42.9 | 14.9 | 105 | 11   | 87   | 441  | 69  | 20  | 668  | 2.4 | MU | NEG | T12 | 49,XY,+12,+18,+19[10]/46,XY[10]                               |
| 9990 | M | 0 | 18.3 | ND   | A | 0   | 23.8 | 15.8 | 187 | 15   | 79   | 915  | 235 | 49  | 676  | 2.1 | MU | NEG | 17P | ND                                                            |
| 227  | M | 0 | 14.3 | 35.1 | B | I   | 73.2 | 14.6 | 195 | 6    | 91   | 1010 | 150 | 29  | 705  | 2   | UM | NEG | ND  | ND                                                            |
| 181  | F | 0 | ND   | 30.5 | A | 0   | 23   | 14.6 | 337 | 23   | 71   | 1120 | 111 | 67  | 711  | 2.9 | MU | NEG | 13Q | ND                                                            |
| 214  | M | 0 | 32.9 | 40.4 | A | 0   | 38.4 | 15.5 | 198 | 9    | 86   |      |     |     | 748  | 2.4 | NR | NEG | T12 | ND                                                            |
| 614  | F | 0 | 54.1 | 71.7 | A | I   | 44.7 | 13.7 | 255 | 9    | 89   | 592  | 86  | 26  | 778  | 2.8 | MU | NEG | 13Q | 46,XX[20]                                                     |
| 1053 | M | 0 | 31.2 | ND   | A | 0   | 24.9 | 16.9 | 166 | 21   | 71   | 950  | 236 | 49  | 818  | 2   | MU | NEG | 11Q | ND                                                            |
| 294  | F | 0 | 42.1 | 57.5 | A | 0   | 243  | 12.4 | 184 | 8    | 83   | 691  | 41  | 17  | 1029 | 2.7 | UM | POS | 11Q | 44~45,XX,del(11)(q21q23),-17,+2mar[cp4]/47,XX,+6[1]/46,XX[15] |
| 133  | F | 0 | 30.7 | 58.5 | A | I   | 8.5  | 12.5 | 211 | 53.8 | 37.1 |      |     |     |      | 1.9 | M  | NEG | 17P | ND                                                            |
| 806  | F | 0 | 37.4 | 54.9 | C | III | 134  | 8.8  | 248 | 11   | 85   | 1210 | 153 | 52  | 894  | 4.2 | M  | POS | T12 | 47,XX,+12[6], 46,XX[14]                                       |

A, AMG-176; WBC, White blood cells; HGB, hemoglobin; PLT, platelets; Neut, neutrophils; Lymph, % lymphocytes; LDH, lactate dehydrogenase; IGHV, immunoglobulin heavy chain; FISH, fluorescent in situ hybridization; highlighted columns 4 and 5 show percent apoptosis after 24 hour incubation with AMG-176; UM, unmutated; M, mutated; POS, positive; NEG, negative; M, male; F, female; 13Q, 13q deletion; T12, trisomy 12; 17p, 17p deletion; 11q, 11q deletion; ND, not done
