# Supplementary material
Source: PubMed Central journal article supplement (PMC7358119)
Supplement: NIHMS1550096-supplement-4.pdf [file NIHMS1550096-supplement-4.pdf]

| <b>Supplementary Table 2. Characteristics of healthy donors</b> |        |     |  |
|-----------------------------------------------------------------|--------|-----|--|
| Donor #                                                         | Gender | Age |  |
| HD-1                                                            | Female | 42  |  |
| HD-2                                                            | Female | 52  |  |
| HD-3                                                            | Female | 57  |  |
| HD-4                                                            | Male   | 35  |  |
| HD-5                                                            | Male   | 38  |  |
| HD-6                                                            | Male   | 60  |  |

HD, healthy donor
