# Supplementary material
Source: PubMed Central journal article supplement (PMC7358119)
Supplement: NIHMS1550096-supplement-5.pdf [file NIHMS1550096-supplement-5.pdf]

**Supplementary Table 3. Antibodies for immunoblots and their sources**

| Antibodies    | Source                                        | Catalog # |
|---------------|-----------------------------------------------|-----------|
| Bak, NT       | EMD Millipore Corporation, Temecula, CA       | 06-536    |
| Bax           | Sigma-Aldrich, St. Louis, MO                  | B8554     |
| Bcl-2         | Dako, Carpinteria, CA                         | M0887     |
| Bcl-XL        | Cell Signaling Technology, Danvers, MA        | 2764S     |
| Cleaved Casp3 | Cell Signaling Technology, Danvers, MA        | 96642     |
| Cytochrome C  | Santa Cruz, Dallas, TX                        | sc-13156  |
| GAPDH         | GeneTex International Corporation, Irvine, CA | GTX627408 |
| Mcl-1         | Cell Signaling Technology, Danvers, MA        | 94296     |
| PARP          | Enzo Life Sciences, Farmingdale, NY           | BML-SA250 |
| Tom 20        | Santa Cruz, Dallas, TX                        | sc-11415  |
| Vinculin      | Sigma-Aldrich, St. Louis, MO                  | 13901     |
|               |                                               |           |
