# Supplementary material
Source: PubMed Central journal article supplement (PMC7358119)
Supplement: NIHMS1550096-supplement-6.pdf [file NIHMS1550096-supplement-6.pdf]

**Supplementary Table 4. Effect of combination of low concentration of venetoclax and AMG-176 on cell death**

| Drug, nM         | % Cell death at 24 hours |      |        |        |      |        |        |      |        |        |      |        |        |      |        |
|------------------|--------------------------|------|--------|--------|------|--------|--------|------|--------|--------|------|--------|--------|------|--------|
|                  | Pt 133                   |      |        | Pt 291 |      |        | Pt 963 |      |        | Pt 897 |      |        | Pt 689 |      |        |
|                  | Obs                      | Exp  | Ratio* | Obs    | Exp  | Ratio* | Obs    | Exp  | Ratio* | Obs    | Exp  | Ratio* | Obs    | Exp  | Ratio* |
| Ven 1            | 15                       |      |        | 5.2    |      |        |        |      |        |        |      |        |        |      |        |
| Ven 5            | 29                       |      |        | 1.2    |      |        | 11.6   |      |        | 18.4   |      |        | 27.7   |      |        |
| Ven 10           | 32.4                     |      |        | 22.7   |      |        | 22.2   |      |        | 45     |      |        | 30.6   |      |        |
| Ven 30           | 54.9                     |      |        | 26.8   |      |        | 64.7   |      |        | 60.2   |      |        | 31.5   |      |        |
| AMG 100          | 9.2                      |      |        | 0.9    |      |        | 0.3    |      |        | 7.6    |      |        | 27.6   |      |        |
| AMG 300          | 37                       |      |        | 21.4   |      |        | 16.8   |      |        | 12.5   |      |        | 34.1   |      |        |
| Ven 1 + AMG 100  | 36.1                     | 22.8 | 0.63   | 11.5   | 6.1  | 0.53   |        |      |        |        |      |        |        |      |        |
| Ven 5 + AMG 100  | 47.5                     | 35.5 | 0.75   | 8.8    | 2.1  | 0.24   | 26.9   | 11.9 | 0.44   | 35.6   | 24.3 | 0.68   | 48.9   | 47.7 | 0.98   |
| Ven 10 + AMG 100 |                          |      |        |        |      |        | 64     | 22.4 | 0.35   | 59.7   | 49   | 0.82   | 31.8   | 49.8 | 1.57   |
| Ven 30 + AMG 100 |                          |      |        |        |      |        | 67.3   | 64.8 | 0.96   | 62.6   | 63   | 1.01   | 45.7   | 50.4 | 1.10   |
| Ven 1 + AMG 300  | 47.1                     | 46.5 | 0.99   | 24.8   | 25.5 | 1.03   |        |      |        |        |      |        |        |      |        |
| Ven 5 + AMG 300  | 26.8                     | 55.3 | 2.06   | 40.1   | 22.3 | 0.56   | 38.4   | 26.5 | 0.69   | 35.9   | 28.6 | 0.80   | 41.5   | 52.4 | 1.26   |
| Ven 10 + AMG 300 |                          |      |        |        |      |        | 59.2   | 35.3 | 0.60   | 61     | 51.9 | 0.85   | 52.1   | 54.3 | 1.04   |
| Ven 30 + AMG 300 |                          |      |        |        |      |        | 63.3   | 70.6 | 1.12   | 63.9   | 65.2 | 1.02   | 52.4   | 54.7 | 1.04   |

**Ven, Venetoclax; AMG, AMG-176; Obs, observed; Exp, expected; \*Ratio of <1 = synergistic; 1 = additive; and >1 = antagonistic interaction**
