# Supplementary material
Source: PubMed Central journal article supplement (PMC7358119)
Supplement: NIHMS1550096-supplement-7.pdf [file NIHMS1550096-supplement-7.pdf]

**Supplementary Table 5. Effect of combination of 100 nM venetoclax with 100 or 300 nM AMG-176 on cell death**

| % Cell death at 24 hours |            |                |                |                            |                            |                            |        |                            |        |
|--------------------------|------------|----------------|----------------|----------------------------|----------------------------|----------------------------|--------|----------------------------|--------|
| Pt #                     | Ven 100 nM | AMG-176 100 nM | AMG-176 300 nM | Ven 100 + AMG 100 observed | Ven 100 + AMG 300 observed | Ven 100 + AMG 100 expected | Ratio* | Ven 100 + AMG 300 expected | Ratio* |
| 455                      | 41.5       | 0.5            | 8.0            | 57.2                       | 56.8                       | 41.8                       | 0.73   | 46.2                       | 0.81   |
| x043                     | 16.5       | 6.5            | 11.8           | 36.7                       | 36.2                       | 22.0                       | 0.60   | 26.4                       | 0.73   |
| 213                      | 26.8       | 10.7           | 12.6           | 30.8                       | 32.3                       | 35.0                       | 1.14   | 36.0                       | 1.11   |
| 595                      | 34.5       | 4.6            | 16.5           | 34.8                       | 32.2                       | 38.0                       | 1.09   | 45.0                       | 1.40   |
| 692                      | 55.8       | -0.7           | 17.8           | 57.9                       | 57.3                       | 55.5                       | 0.96   | 64.0                       | 1.12   |
| 3056                     | 45.5       | 9.5            | 32.9           | 40.8                       | 44.5                       | 51.0                       | 1.25   | 63.4                       | 1.42   |
| 839                      | 33.3       | 12.6           | 22.6           | 36.3                       | 35.8                       | 42.0                       | 1.16   | 48.0                       | 1.34   |
| 720                      | 50.6       | 8.8            | 26.3           | 61.4                       | 64.5                       | 55.0                       | 0.90   | 64.0                       | 0.99   |
| 289                      | 29.9       | 5.4            | 11.3           | 35.6                       | 35.3                       | 34.0                       | 0.96   | 38.0                       | 1.08   |
| 244                      | 63.7       | 4.4            | 30.0           | 64.3                       | 67.6                       | 75.0                       | 1.17   | 65.0                       | 0.96   |
| 907                      | 59.6       | 10.6           | 47.9           | 63.6                       | 57.0                       | 64.0                       | 1.01   | 79.0                       | 1.39   |
| 9005                     | 30.4       | 7.3            | 30.4           | 44.3                       | 47.1                       | 52.0                       | 1.17   | 94.0                       | 2.00   |
| 429                      | 63.6       | 2.5            | 12.8           | 64.9                       | 63.2                       | 65.0                       | 1.00   | 87.0                       | 1.38   |
| 814                      | 72.5       | 6.6            | 41.9           | 71.7                       | 75.2                       | 74.0                       | 1.03   | 84.0                       | 1.12   |
| 990                      | 73.3       | 2.6            | 14.3           | 82.6                       | 80.3                       | 74.0                       | 0.90   | 77.0                       | 0.96   |
| 328                      | 27.8       | 5.5            | 26.8           | 37.7                       | 39.5                       | 32.0                       | 0.85   | 47.0                       | 1.19   |
| 327                      | 50.1       | 25.7           | 21.6           | 49.1                       | 51.0                       | 63.0                       | 1.28   | 61.0                       | 1.20   |
| 694                      | 44.0       | 2.5            | 15.7           | 42.2                       | 42.6                       | 45.0                       | 1.07   | 53.0                       | 1.24   |
| 589                      | 5.2        | 1.5            | 3.1            | 7.6                        | 6.8                        | 6.6                        | 0.87   | 8.0                        | 1.18   |
| 3098                     | 13.5       | 4.6            | 1.4            | 19.3                       | 38.3                       | 17.0                       | 0.88   | 15.0                       | 0.39   |
| 382                      | 77.9       | 2.0            | 7.4            | 91.7                       | 91.7                       | 78.0                       | 0.85   | 80.0                       | 0.87   |
| 642                      | 17.8       | 4.6            | 17.8           | 19.4                       | 20.1                       | 22.0                       | 1.13   | 32.0                       | 1.59   |
| 216                      | 23.2       | -6.4           | 20.5           | 35.4                       | 38.7                       | 18.0                       | 0.51   | 39.0                       | 1.01   |
| 888                      | 44.0       | 2.5            | 15.7           | 42.2                       | 42.6                       | 47.0                       | 1.11   | 55.0                       | 1.29   |
| 801                      | 7.0        | 4.6            | 3.0            | 8.9                        | 10.9                       | 10.0                       | 1.12   | 11.0                       | 1.01   |
| 611                      | 78.1       | 6.1            | 18.3           | 87.3                       | 90.5                       | 79.0                       | 0.90   | 82.0                       | 0.91   |
| 137                      | 23.2       | 1.6            | 22.8           | 30.4                       | 37.8                       | 24.0                       | 0.79   | 40.0                       | 1.06   |
| 227                      | 40.8       | 5.5            | 26.3           | 33.2                       | 37.7                       | 44.0                       | 1.33   | 56.0                       | 1.49   |
| 294                      | 42.1       | 16.3           | 31.7           | 57.5                       | 67.8                       | 52.0                       | 0.90   | 60.0                       | 0.88   |

Ven, venetoclax; AMG, AMG-176;  
 \*Ratio of <1 = synergistic; 1 = additive; and >1 = antagonistic interaction
